# Supplementary material
Source: publisher figshare collection journal article supplement (https://frontiersin.figshare.com/ndownloader/files/18024113)

**Supplementary Figure 4.** The results of core function calculation. The Venn diagram indicates the functions within the different feedstocks used in the digestions..

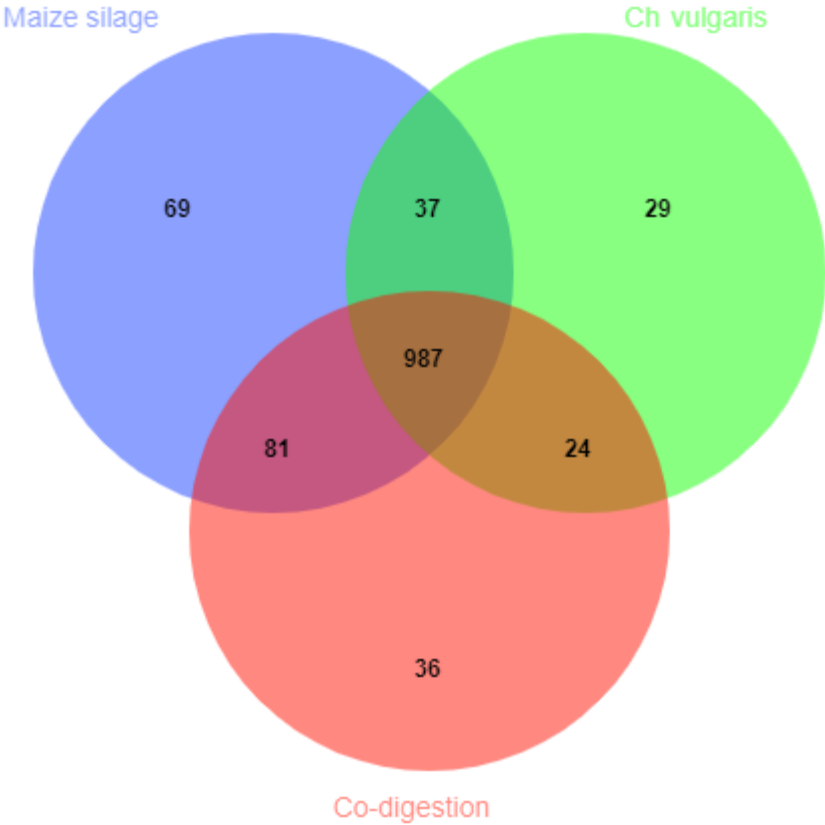

Supplement: Supplementary file 1 [file 18024113]
